# Supplementary material
Source: ML conference proceedings conference paper supplement (https://openreview.net/forum?id=HFUxb_Uiqec)

# Negative log-likelihood

STN

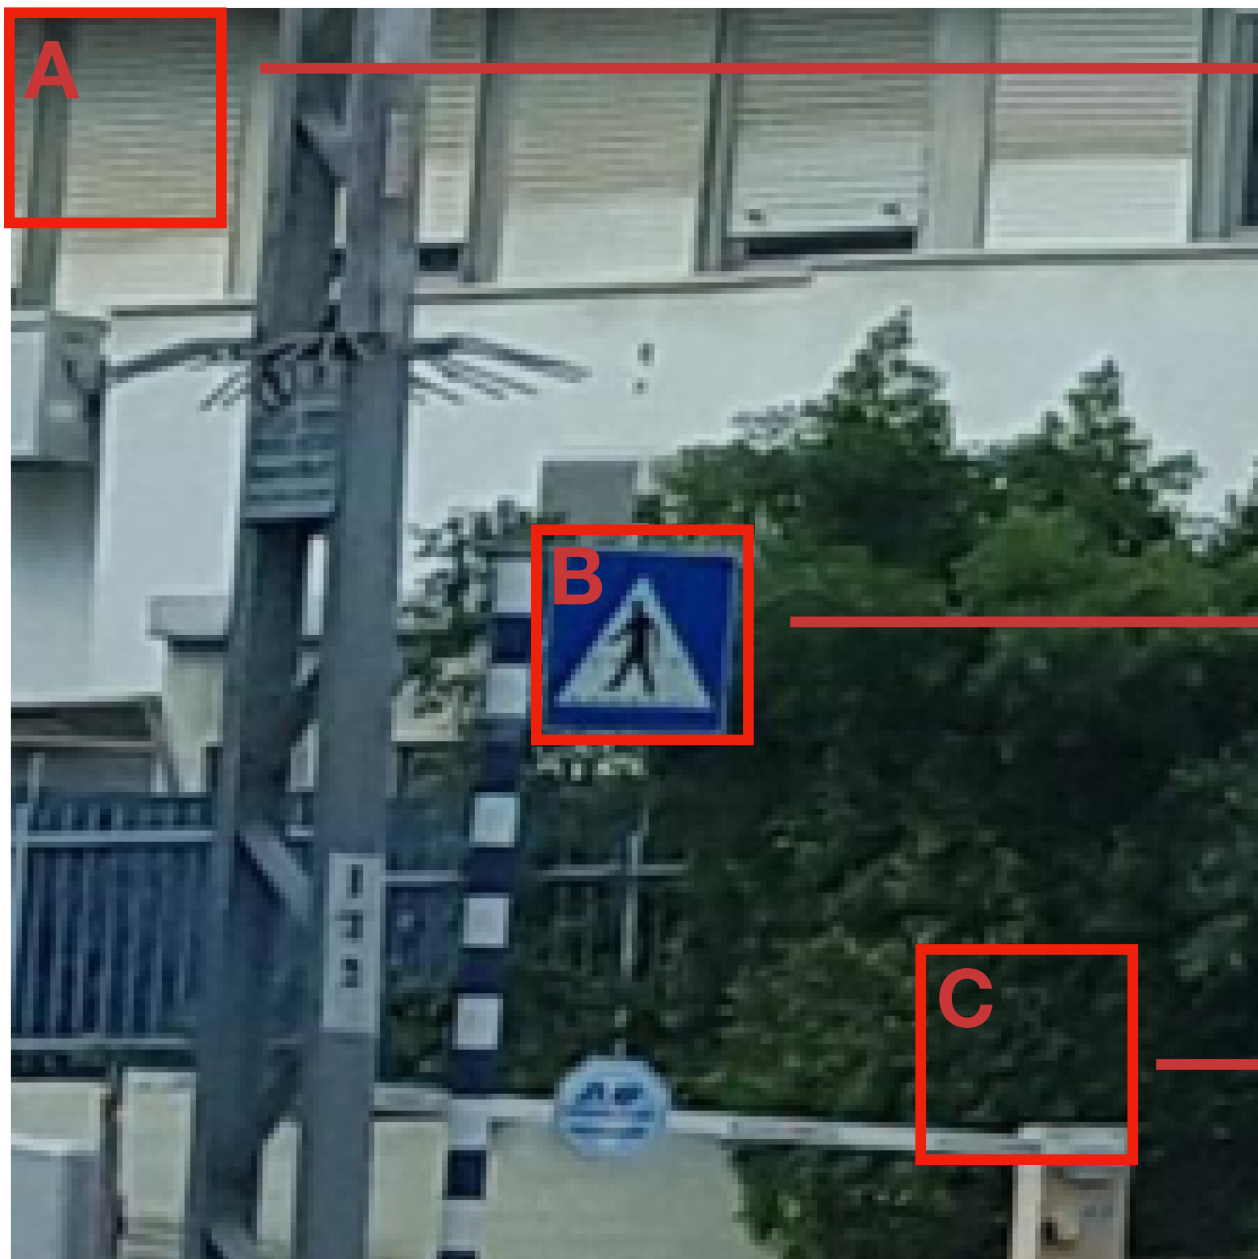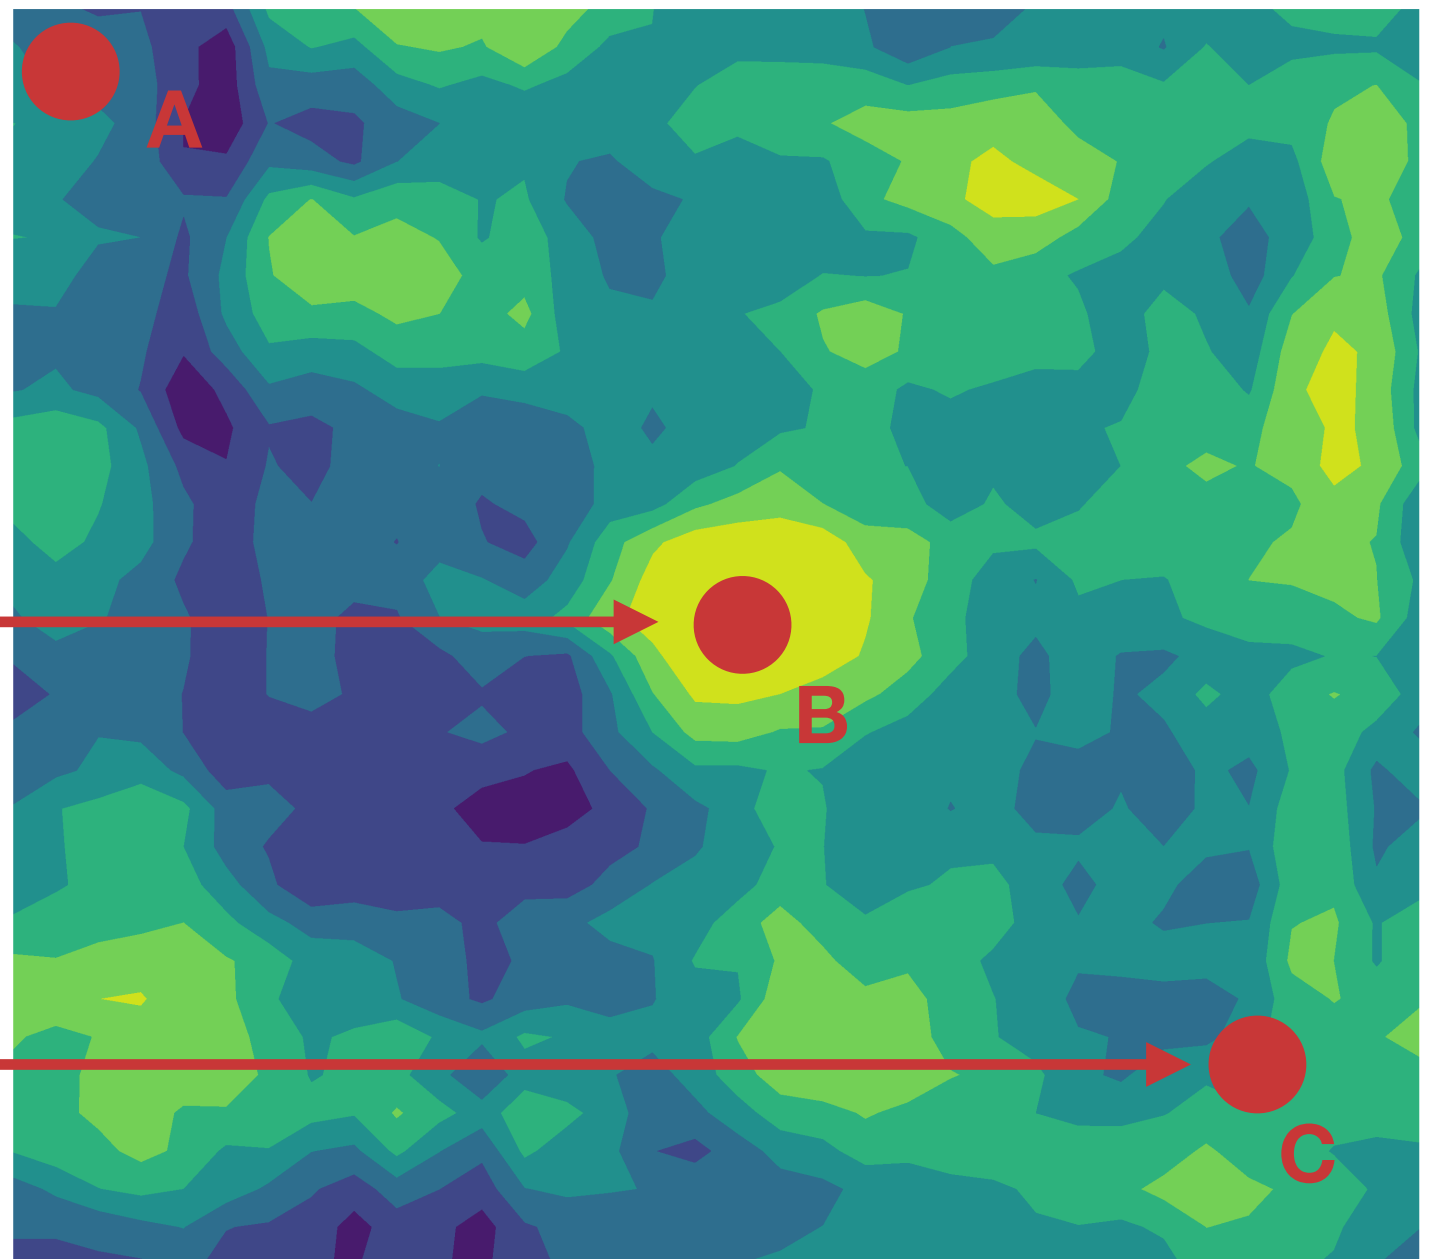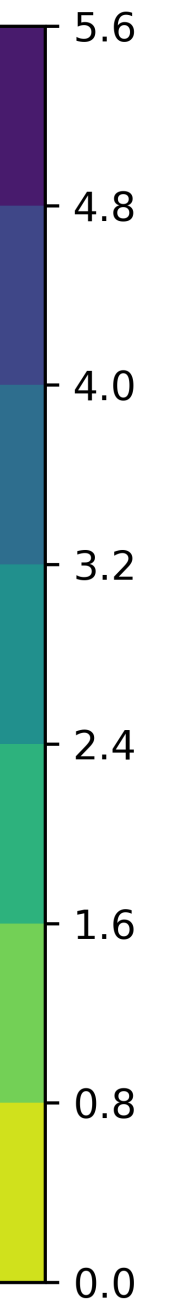

P-STN

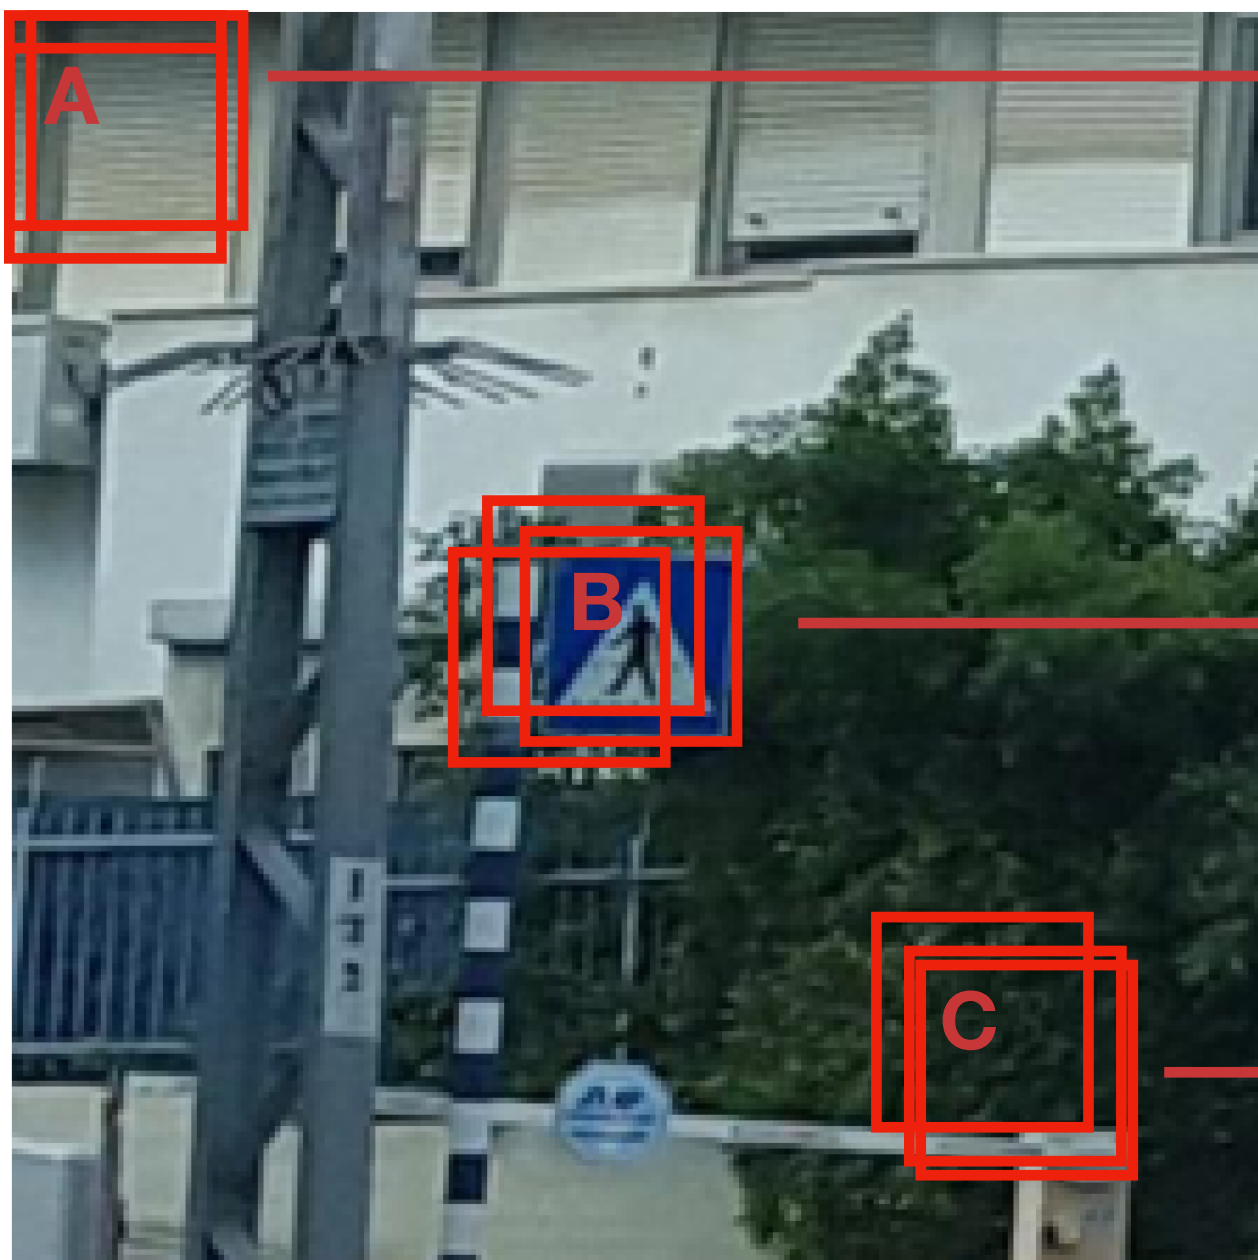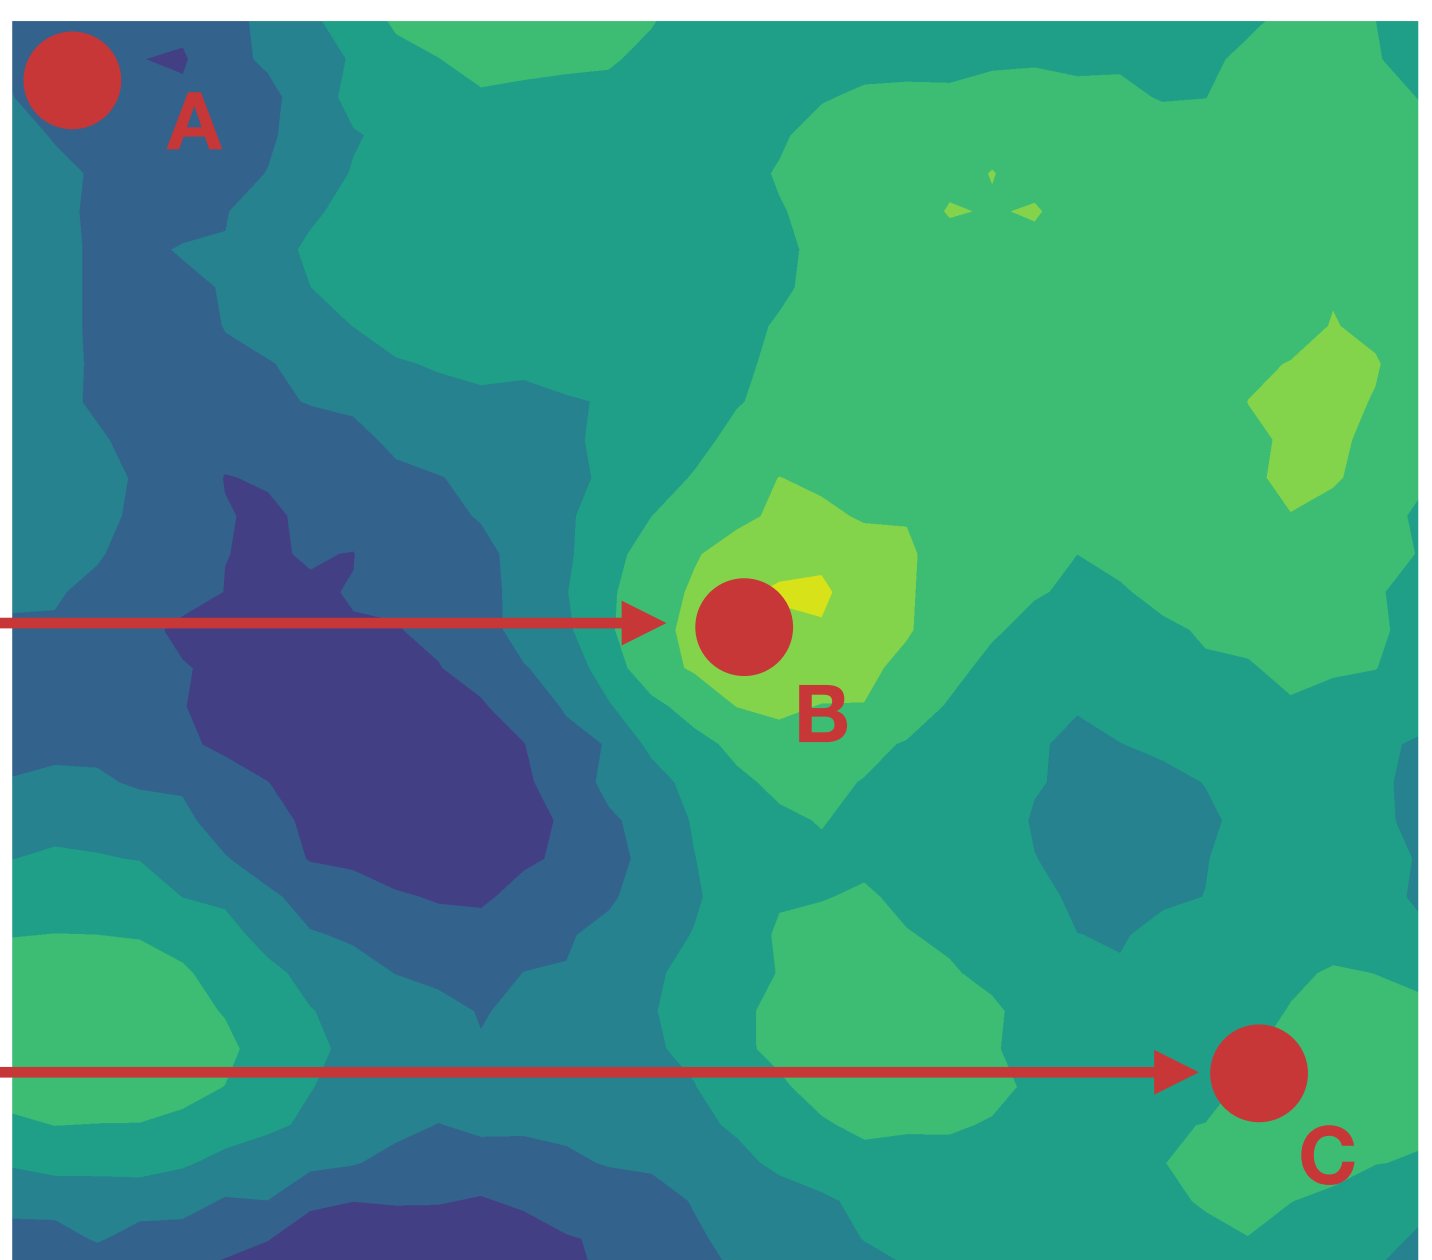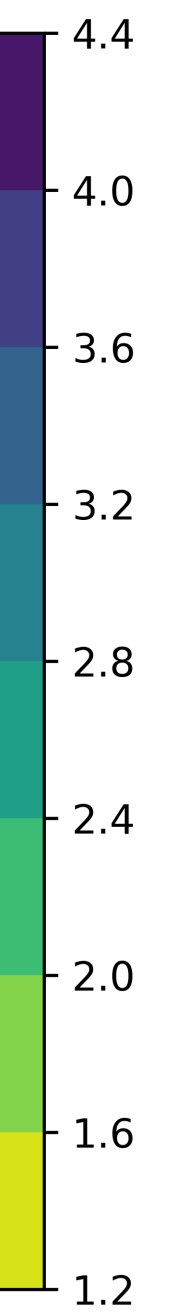

Supplement: supplementary_material [file attachment]

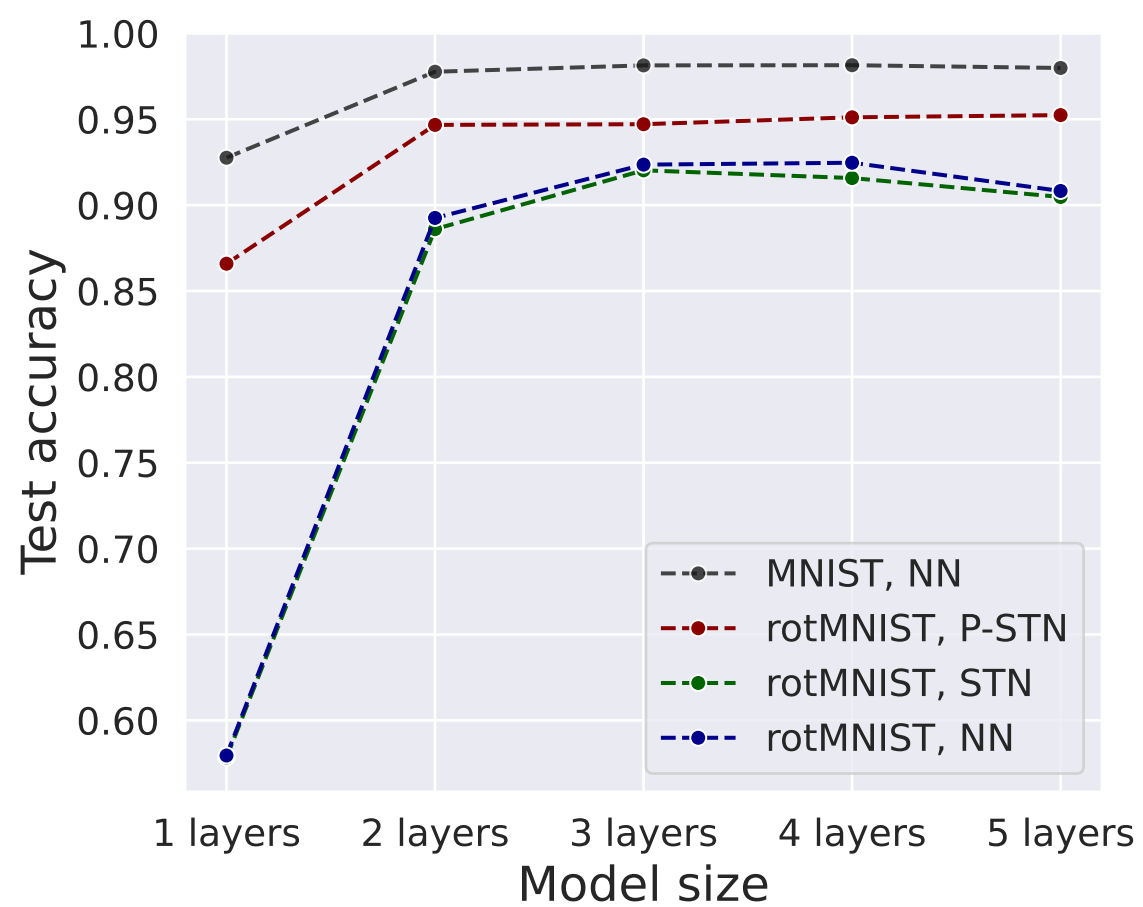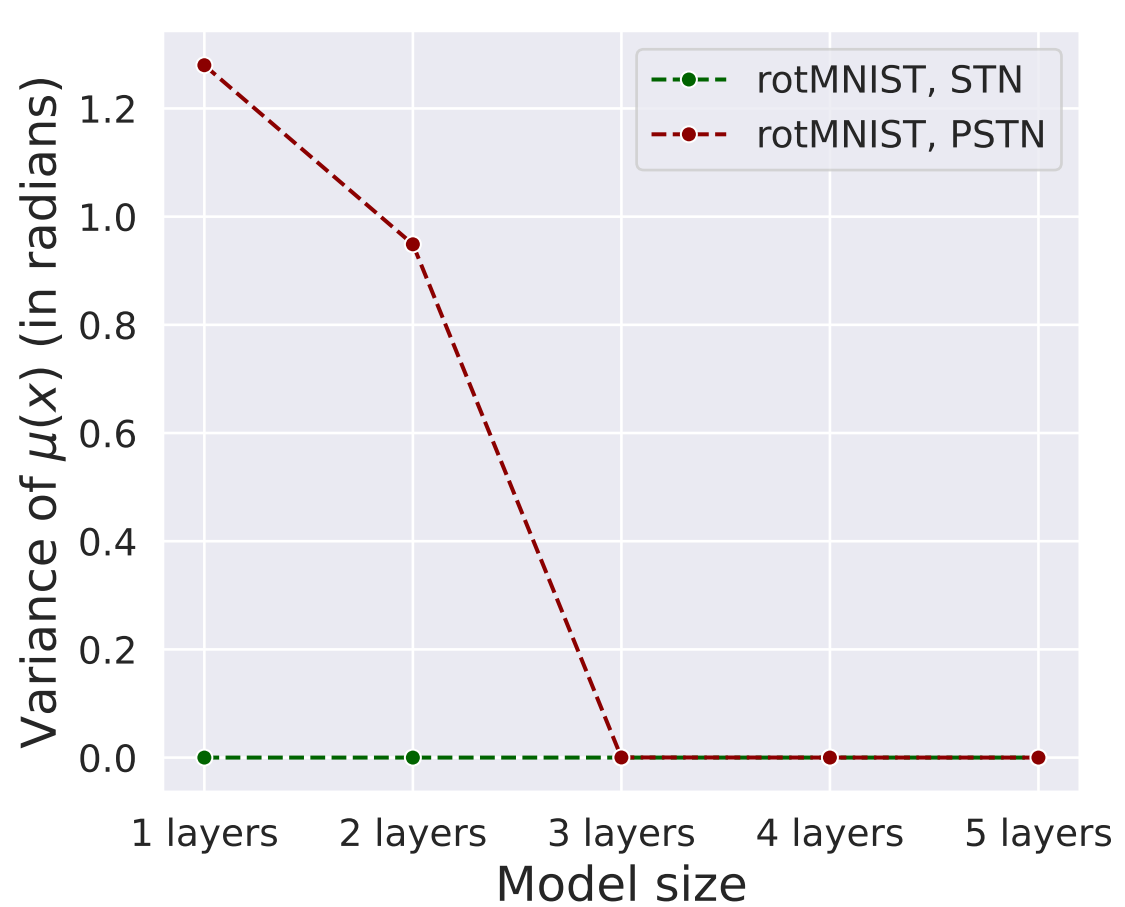

Supplement: supplementary_material [file attachment]

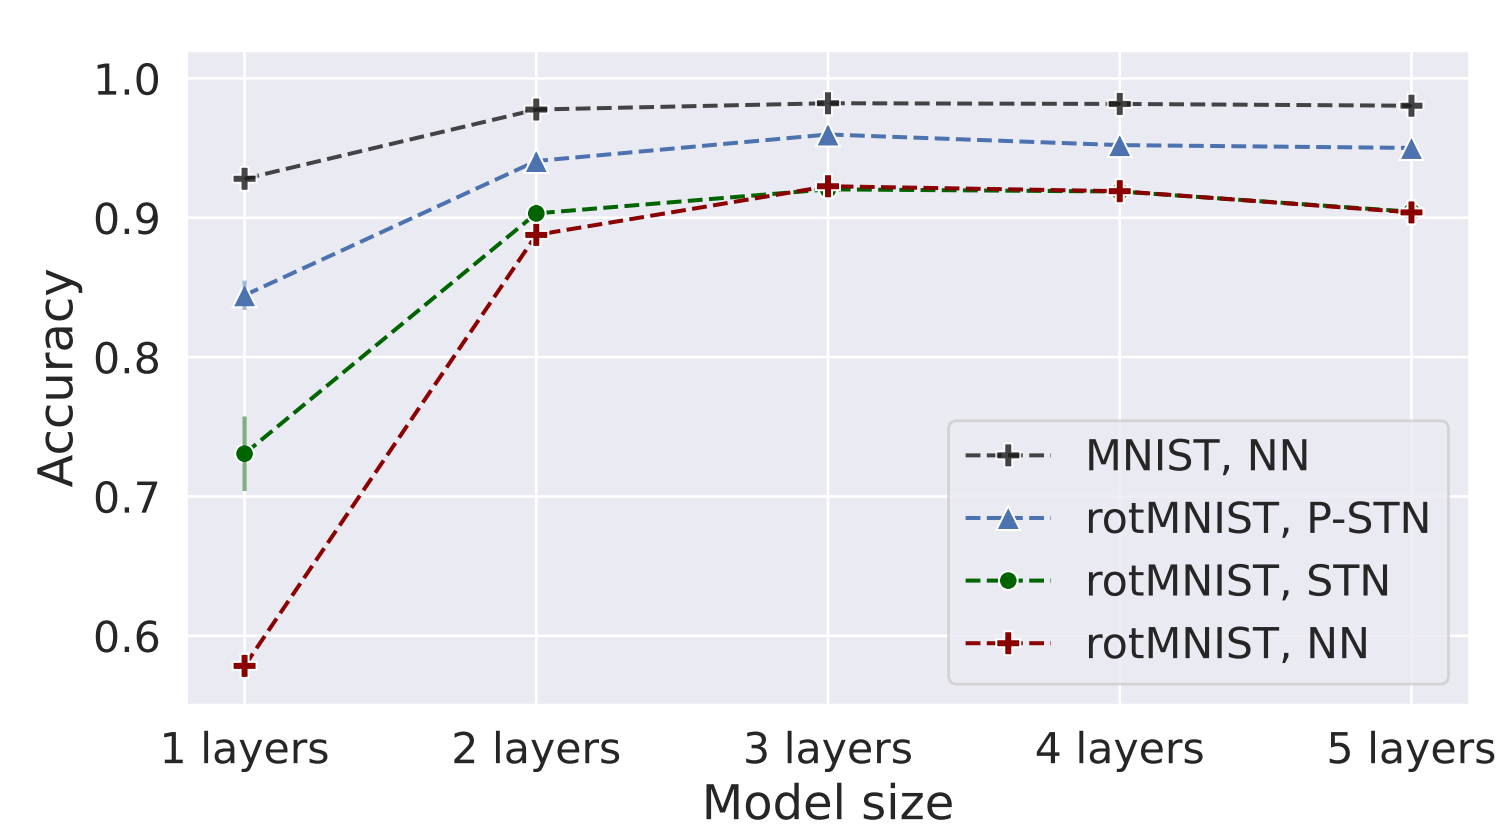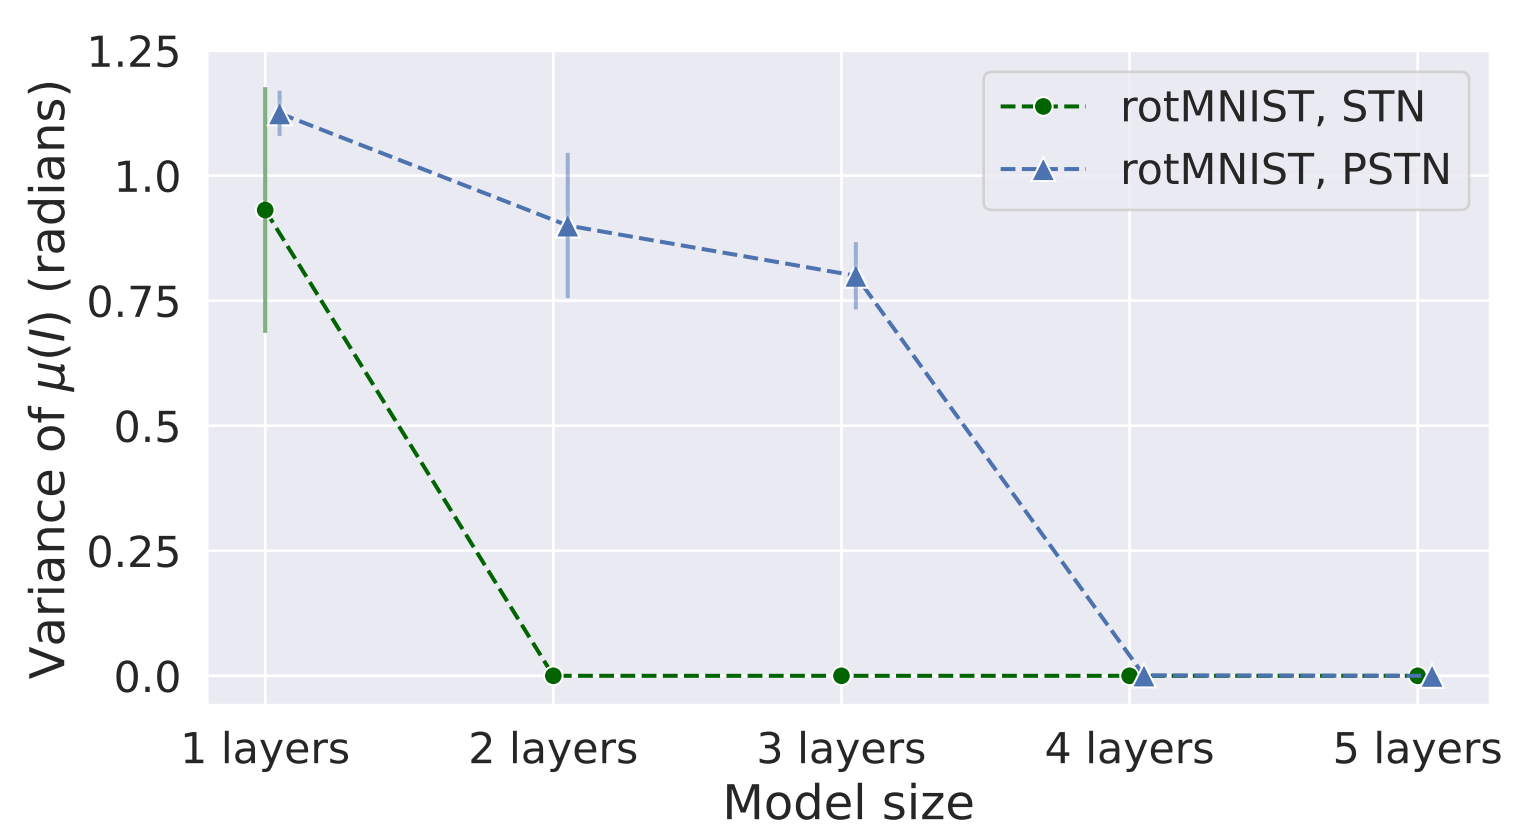

Supplement: supplementary_material [file attachment]

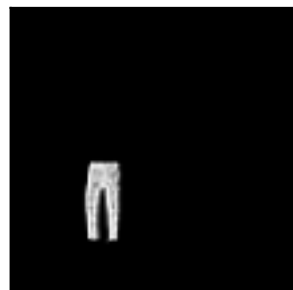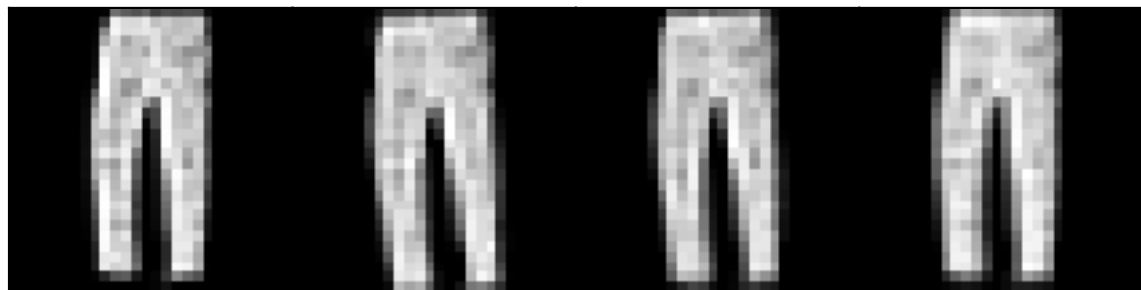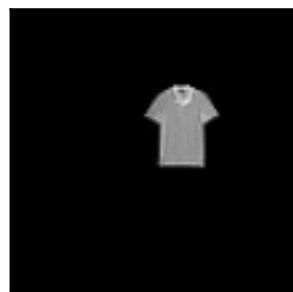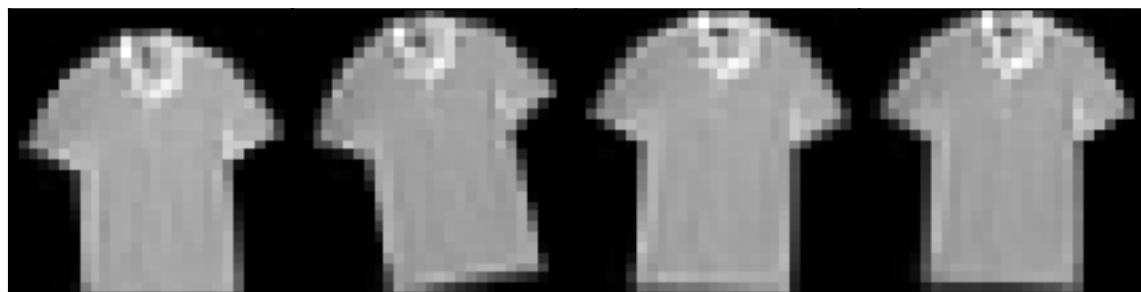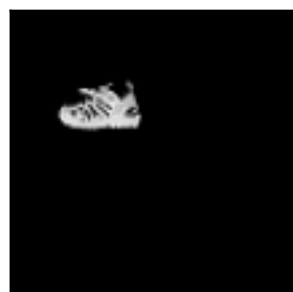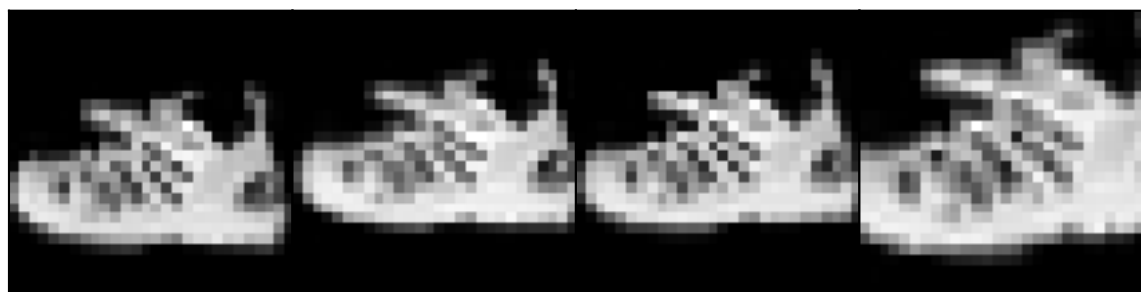

Supplement: supplementary_material [file attachment]

# MNIST subsets

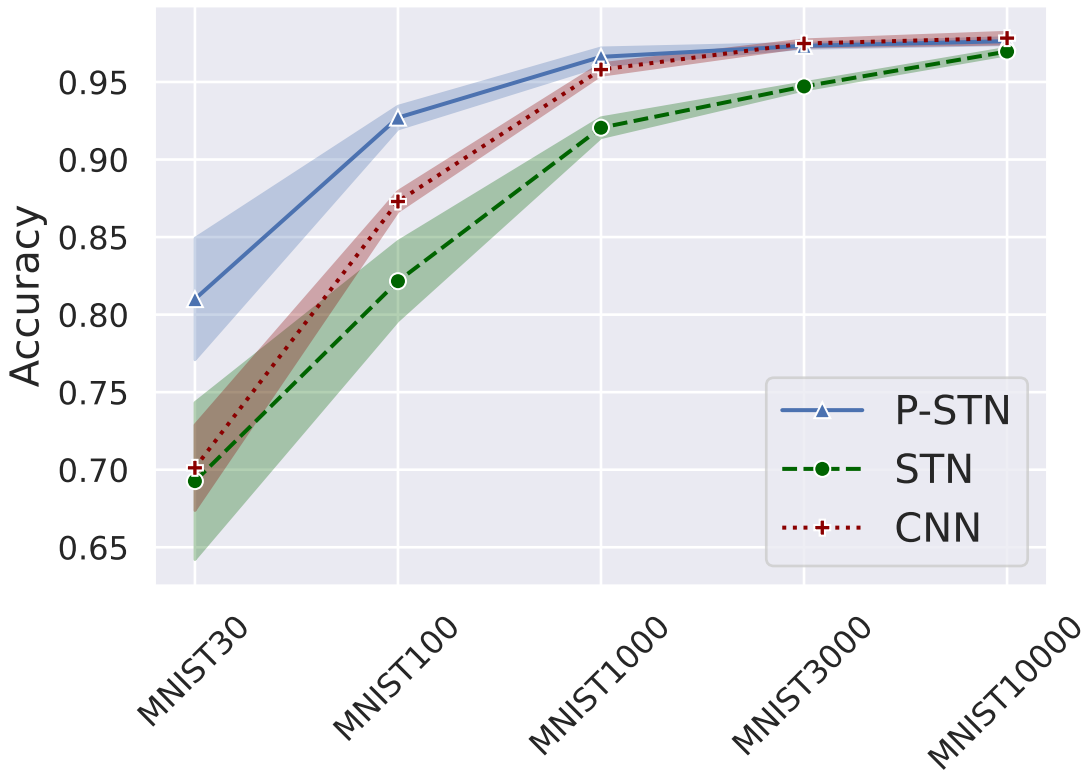

Supplement: supplementary_material [file attachment]

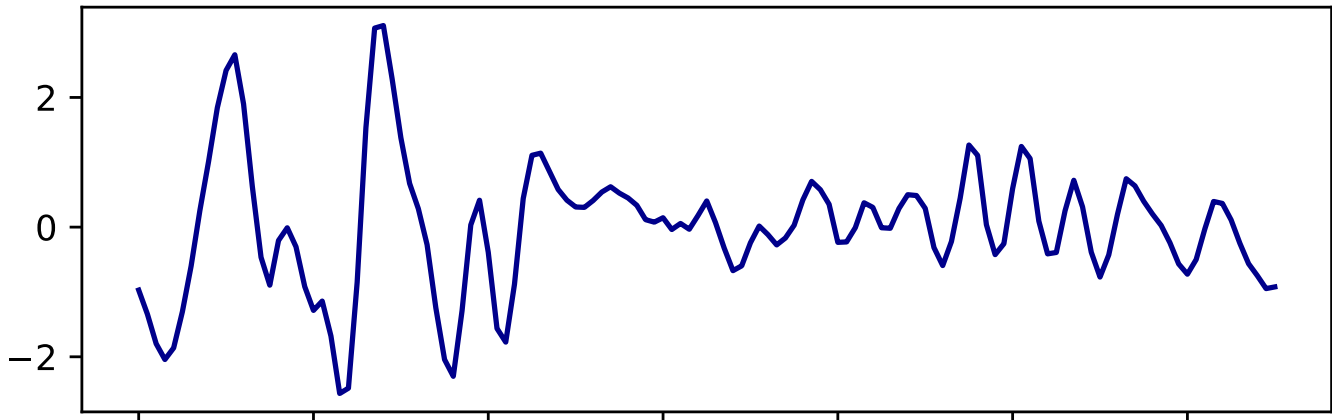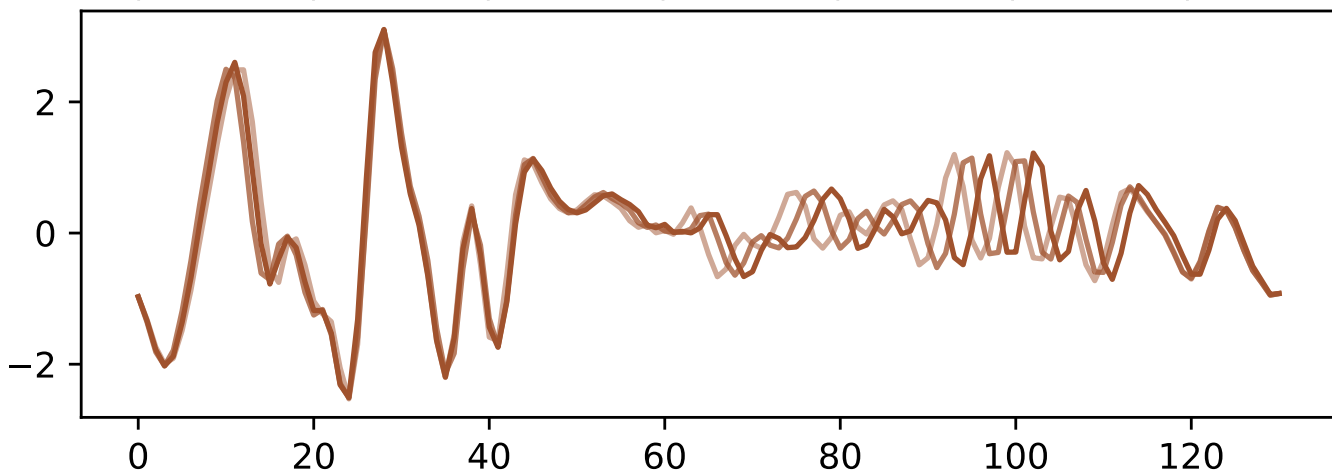

Supplement: supplementary_material [file attachment]

# MNIST100 Calibration

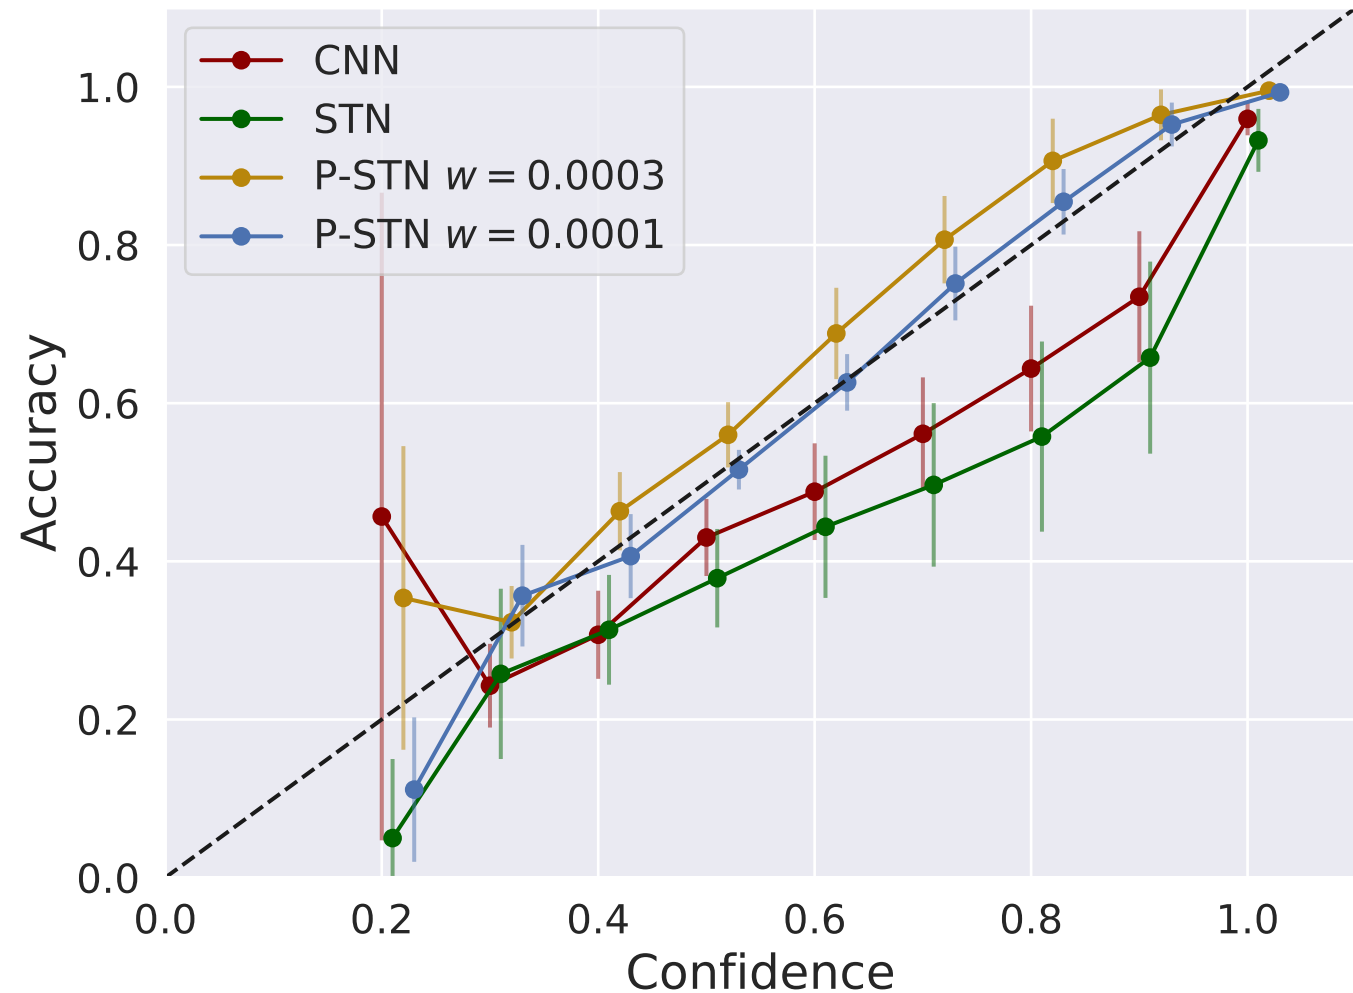

Supplement: supplementary_material [file attachment]

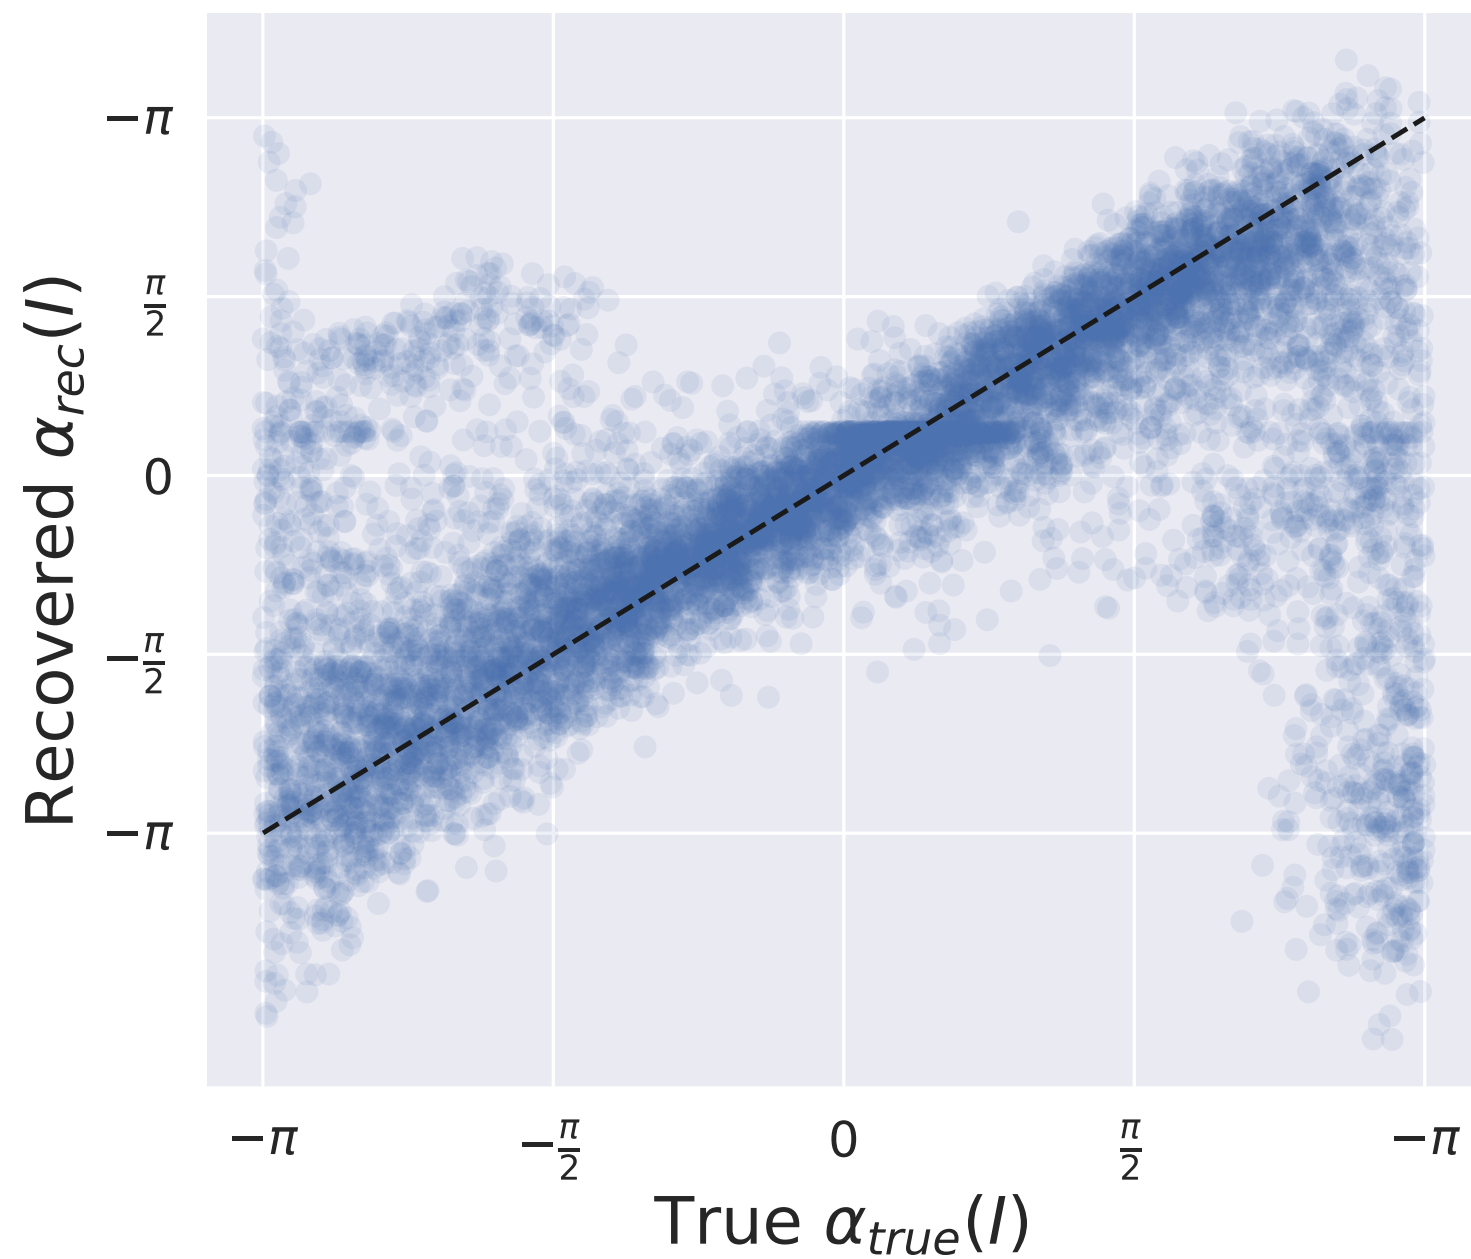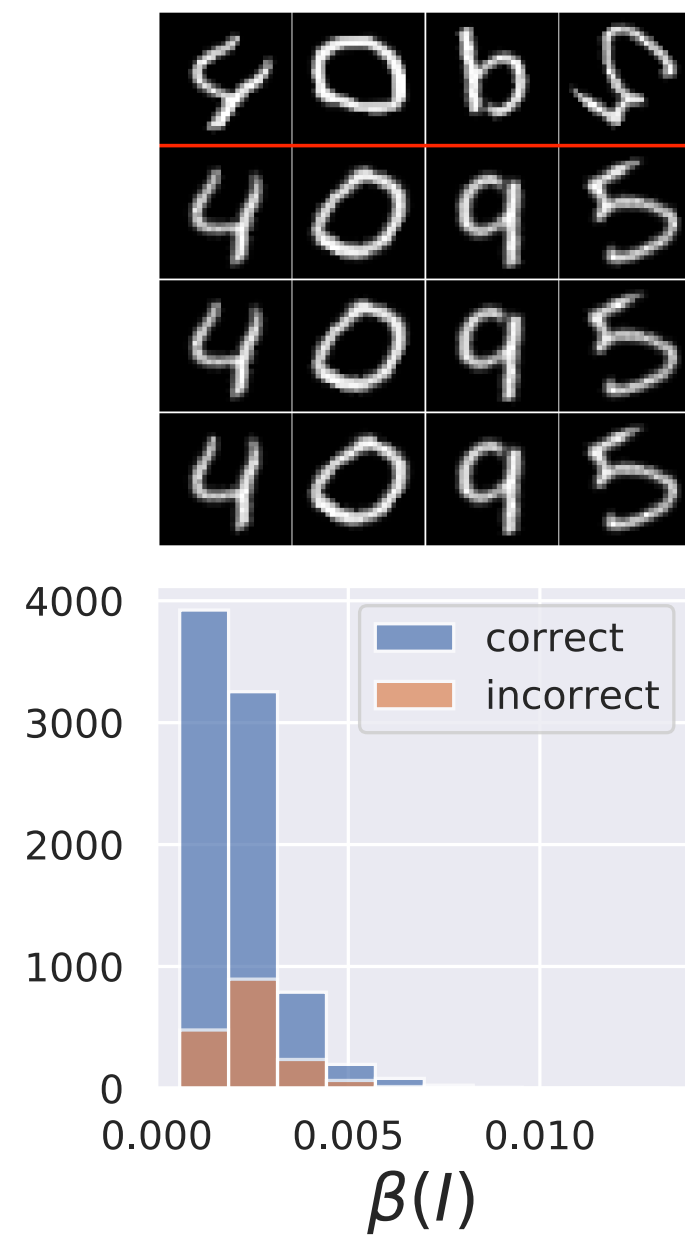

Supplement: supplementary_material [file attachment]

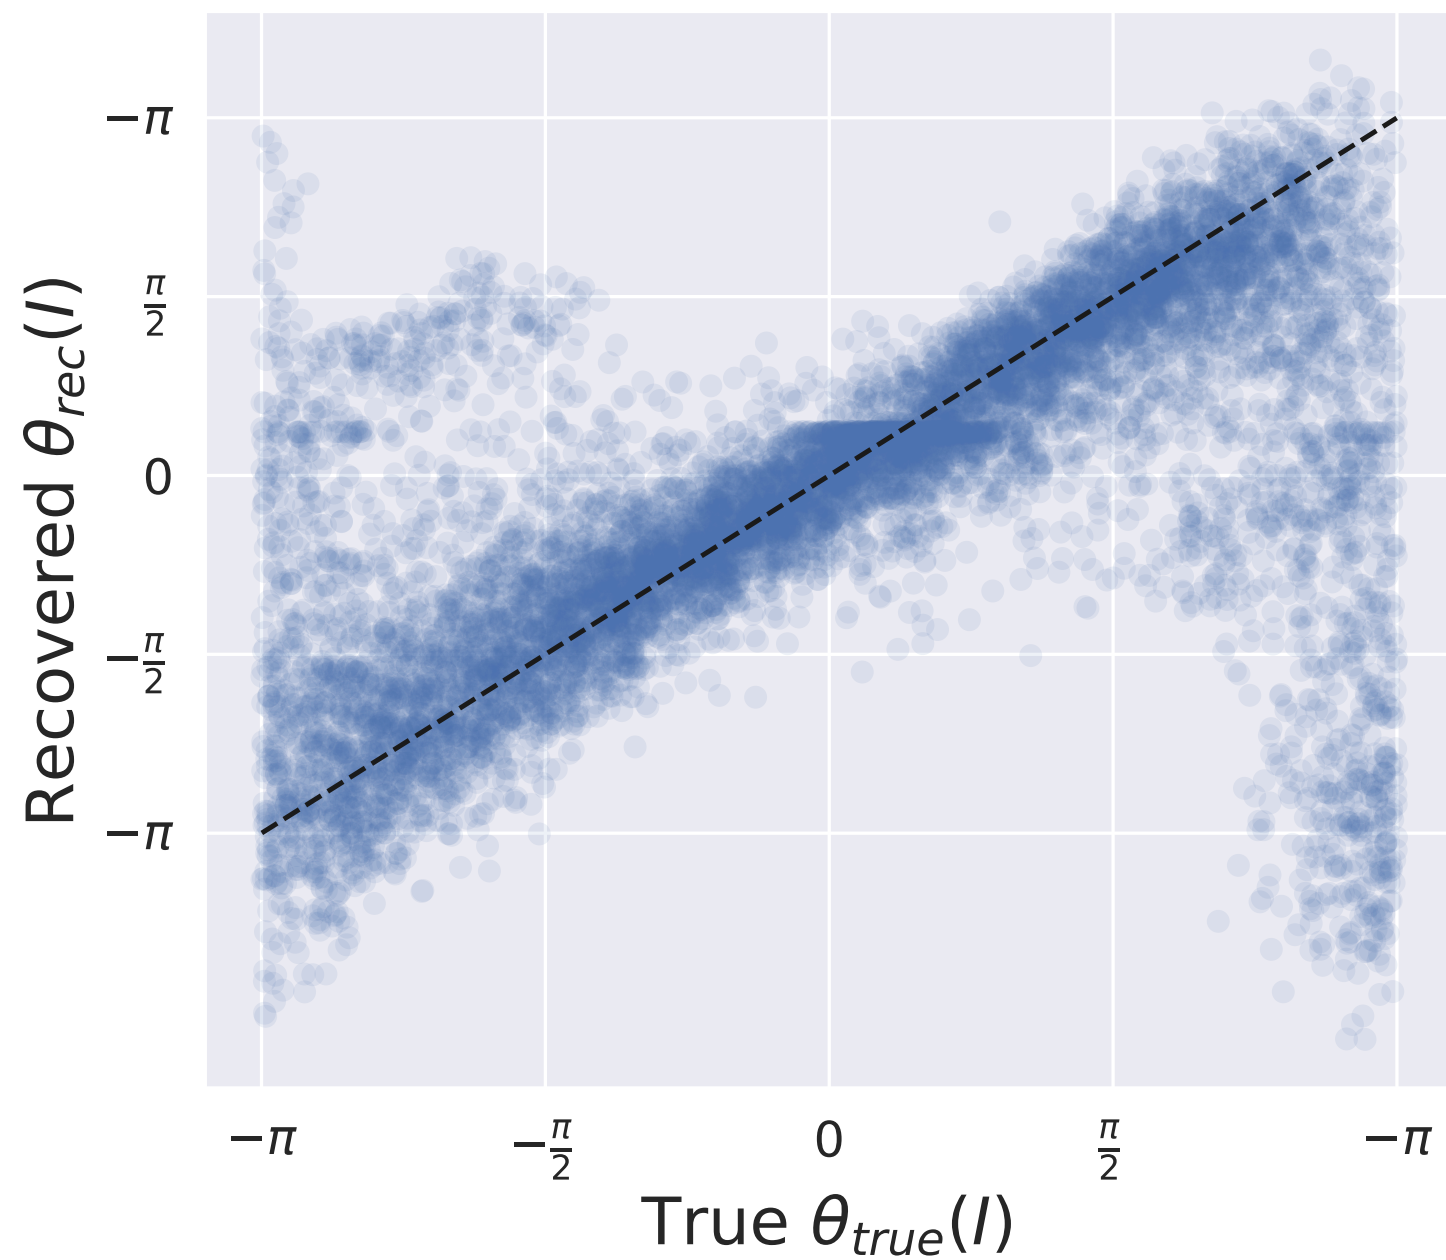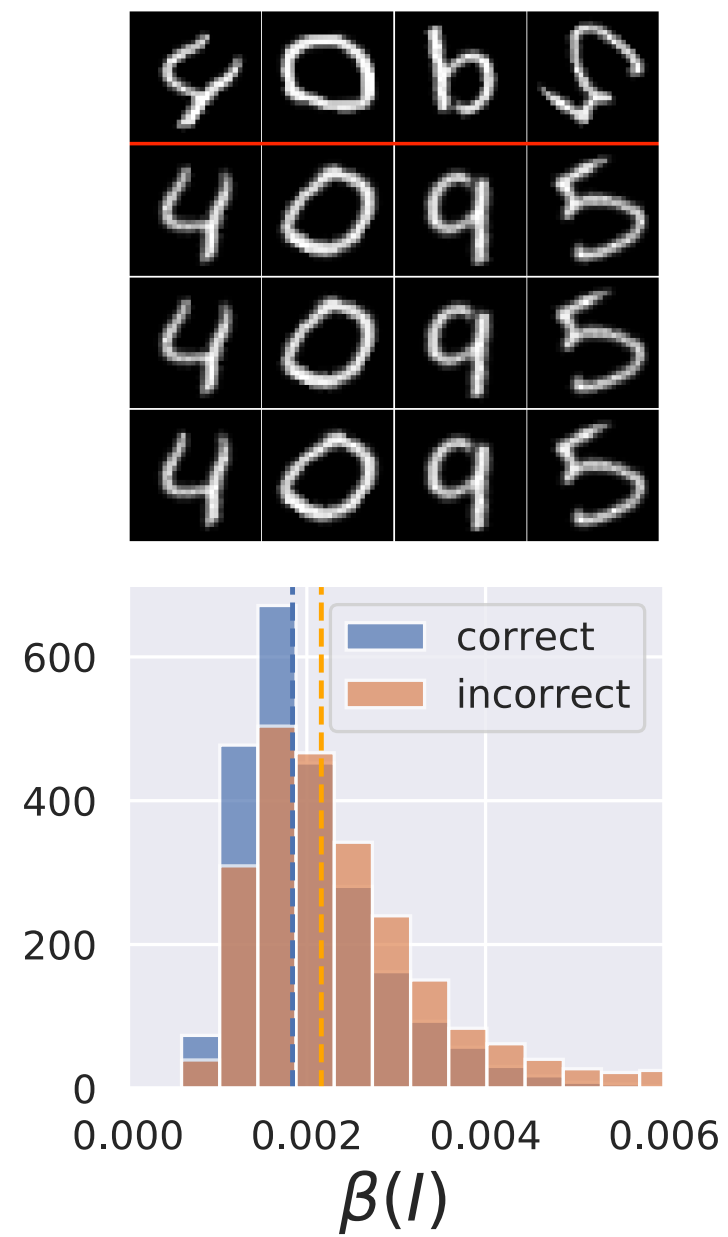

Supplement: supplementary_material [file attachment]

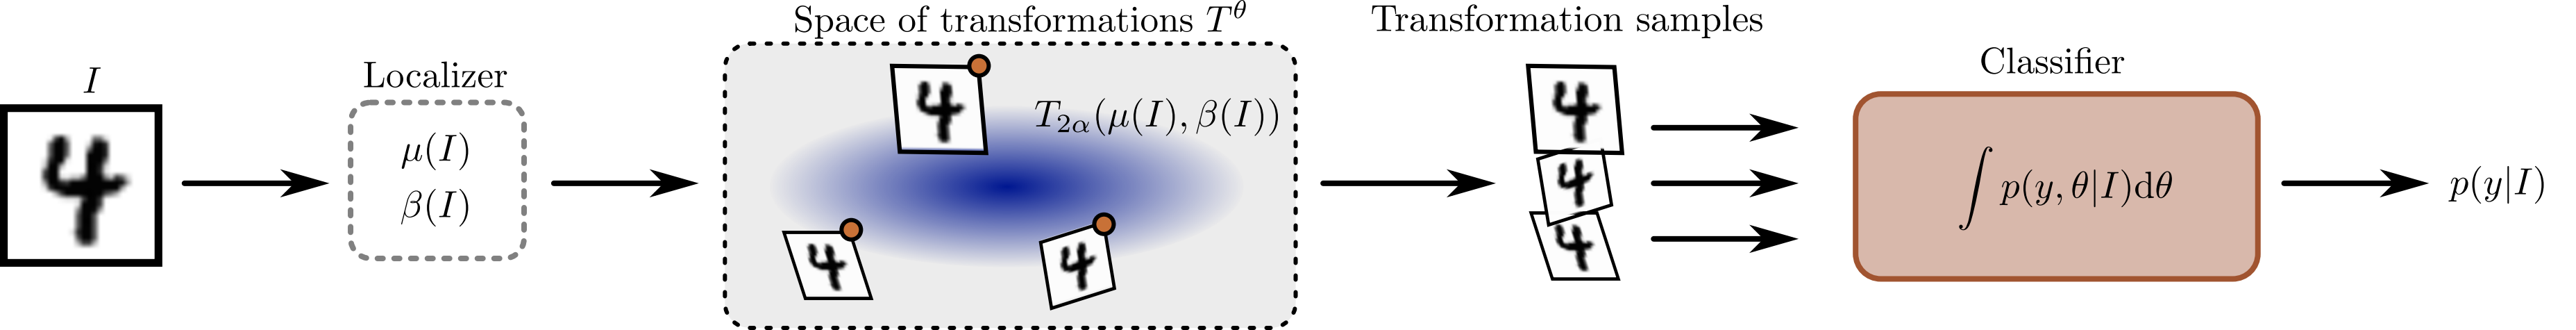

Supplement: supplementary_material [file attachment]

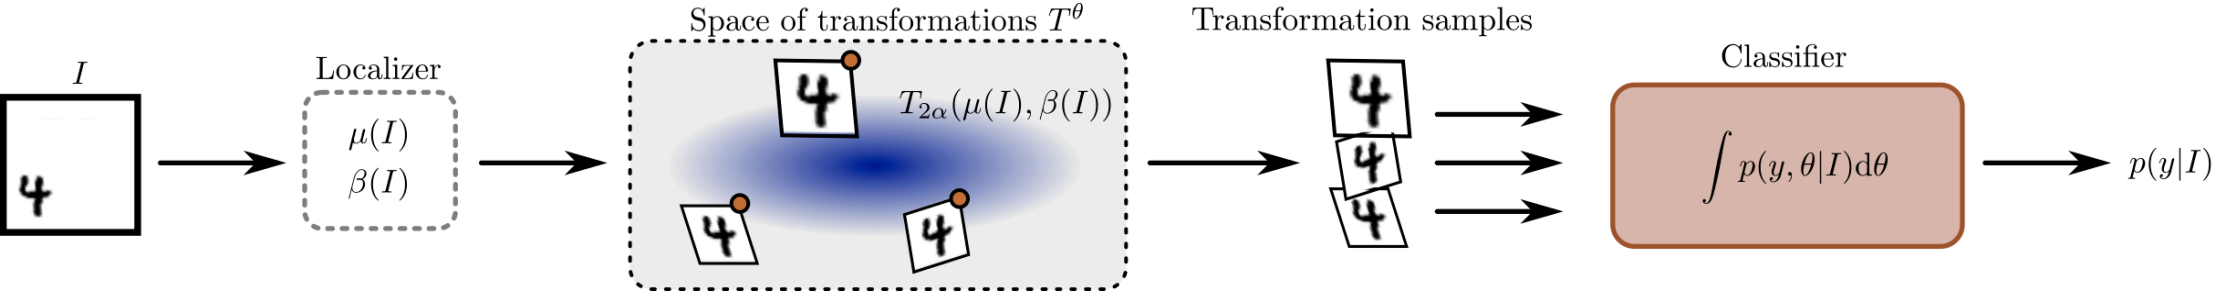

Supplement: supplementary_material [file attachment]
